# Supplementary material
Source: Research Square preprint supplement (doi:10.21203/rs.3.rs-9612513/v1)
Supplement: Supplementary file 1 [file 0bbb1961dd06362a8d9c97ef.docx]

**Supplementary Information**

**Genetic diversity of two endemic axolotl species from Michoacán, Mexico.**

Esther Denice de la Cruz-Santos 1,2, Eria A. Rebollar 3 *, Enrique Soto-Cortés3, Yurixhi Maldonado-López 4, M. Delia Basanta 5,6, Anahí Canedo-Téxon 1, Eugenia Zarza 7,8, Gabriela Castellanos-Morales 1 *

**Table S1**. Per individual (ID) mean coverage before LD filtering (Mean depth coverage) of *A. andersoni* (And) and *A. dumerilii* (Dum) from Michoacán, Mexico.

| ID | Mean depth coverage |
| --- | --- |
| And01 | 16.9032 |
| And02 | 14.3543 |
| And03 | 16.0939 |
| And04 | 18.3225 |
| And05 | 18.3933 |
| And06 | 15.7782 |
| And07 | 15.7082 |
| And08 | 17.1669 |
| And09 | 17.4268 |
| And10 | 19.2791 |
| And11 | 19.7537 |
| And12 | 16.9733 |
| And13 | 15.8867 |
| And14 | 17.246 |
| And15 | 19.2598 |
| And16 | 19.7063 |
| And17 | 16.5669 |
| And18 | 16.7352 |
| And19 | 19.2962 |
| And20 | 16.8935 |
| And21 | 17.973 |
| And22 | 13.6823 |
| And23 | 17.6165 |
| And24 | 14.5419 |
| And25 | 14.8124 |
| And26 | 13.4315 |
| And27 | 16.1949 |
| And28 | 15.7834 |
| And29 | 15.4588 |
| And30 | 14.796 |
| Dum01 | 15.5119 |
| Dum02 | 17.4814 |
| Dum03 | 17.5471 |
| Dum04 | 16.0954 |
| Dum05 | 15.7655 |
| Dum06 | 15.6838 |
| Dum07 | 15.3975 |
| Dum08 | 14.8839 |
| Dum09 | 16.6147 |
| Dum10 | 16.5358 |
| Dum11 | 16.0219 |
| Dum12 | 14.868 |
| Dum13 | 14.7734 |
| Dum19 | 14.7771 |
| Dum20 | 14.5101 |

**Table S2**. Individual relatedness of *A. andersoni* (An) from Michoacán, Mexico.

|  | **An01** | **An02** | **An03** | **An04** | **An05** | **An06** | **An07** | **An08** | **An09** | **An10** | **An11** | **An12** | **An13** | **An14** | **An15** | **An16** | **An17** | **An18** | **An19** | **An20** | **An21** | **An22** | **An23** | **An24** | **An25** | **An26** | **An27** | **An28** | **An29** | **An30** |
| --- | --- | --- | --- | --- | --- | --- | --- | --- | --- | --- | --- | --- | --- | --- | --- | --- | --- | --- | --- | --- | --- | --- | --- | --- | --- | --- | --- | --- | --- | --- |
| **An01** |  |  |  |  |  |  |  |  |  |  |  |  |  |  |  |  |  |  |  |  |  |  |  |  |  |  |  |  |  |  |
| **An02** | 0.24 |  |  |  |  |  |  |  |  |  |  |  |  |  |  |  |  |  |  |  |  |  |  |  |  |  |  |  |  |  |
| **An03** | 0.27 | 0.24 |  |  |  |  |  |  |  |  |  |  |  |  |  |  |  |  |  |  |  |  |  |  |  |  |  |  |  |  |
| **An04** | 0.29 | 0.25 | 0.27 |  |  |  |  |  |  |  |  |  |  |  |  |  |  |  |  |  |  |  |  |  |  |  |  |  |  |  |
| **An05** | 0.27 | 0.22 | 0.26 | 0.29 |  |  |  |  |  |  |  |  |  |  |  |  |  |  |  |  |  |  |  |  |  |  |  |  |  |  |
| **And06** | 0.28 | 0.22 | 0.26 | 0.28 | 0.27 |  |  |  |  |  |  |  |  |  |  |  |  |  |  |  |  |  |  |  |  |  |  |  |  |  |
| **An07** | 0.27 | 0.22 | 0.26 | 0.28 | 0.27 | 0.27 |  |  |  |  |  |  |  |  |  |  |  |  |  |  |  |  |  |  |  |  |  |  |  |  |
| **An08** | 0.29 | 0.22 | 0.25 | 0.28 | 0.27 | 0.27 | 0.28 |  |  |  |  |  |  |  |  |  |  |  |  |  |  |  |  |  |  |  |  |  |  |  |
| **An09** | 0.29 | 0.24 | 0.26 | 0.29 | 0.27 | 0.27 | 0.29 | 0.28 |  |  |  |  |  |  |  |  |  |  |  |  |  |  |  |  |  |  |  |  |  |  |
| **An10** | 0.29 | 0.25 | 0.27 | 0.29 | 0.28 | 0.28 | 0.28 | 0.29 | 0.30 |  |  |  |  |  |  |  |  |  |  |  |  |  |  |  |  |  |  |  |  |  |
| **An11** | 0.29 | 0.25 | 0.28 | 0.31 | 0.29 | 0.28 | 0.28 | 0.29 | 0.30 | 0.31 |  |  |  |  |  |  |  |  |  |  |  |  |  |  |  |  |  |  |  |  |
| **An12** | 0.29 | 0.25 | 0.27 | 0.29 | 0.28 | 0.28 | 0.29 | 0.29 | 0.30 | 0.30 | 0.30 |  |  |  |  |  |  |  |  |  |  |  |  |  |  |  |  |  |  |  |
| **An13** | 0.28 | 0.23 | 0.26 | 0.28 | 0.28 | 0.27 | 0.28 | 0.29 | 0.29 | 0.29 | 0.29 | 0.30 |  |  |  |  |  |  |  |  |  |  |  |  |  |  |  |  |  |  |
| **An14** | 0.27 | 0.22 | 0.25 | 0.28 | 0.27 | 0.27 | 0.28 | 0.27 | 0.27 | 0.28 | 0.28 | 0.27 | 0.28 |  |  |  |  |  |  |  |  |  |  |  |  |  |  |  |  |  |
| **An15** | 0.29 | 0.24 | 0.26 | 0.29 | 0.28 | 0.28 | 0.28 | 0.28 | 0.29 | 0.29 | 0.30 | 0.29 | 0.29 | 0.28 |  |  |  |  |  |  |  |  |  |  |  |  |  |  |  |  |
| **An16** | 0.29 | 0.24 | 0.27 | 0.29 | 0.28 | 0.28 | 0.29 | 0.29 | 0.29 | 0.30 | 0.31 | 0.29 | 0.29 | 0.27 | 0.30 |  |  |  |  |  |  |  |  |  |  |  |  |  |  |  |
| **An17** | 0.28 | 0.22 | 0.26 | 0.28 | 0.27 | 0.27 | 0.28 | 0.27 | 0.28 | 0.29 | 0.29 | 0.29 | 0.28 | 0.27 | 0.27 | 0.28 |  |  |  |  |  |  |  |  |  |  |  |  |  |  |
| **An18** | 0.28 | 0.25 | 0.26 | 0.29 | 0.27 | 0.27 | 0.28 | 0.29 | 0.30 | 0.29 | 0.30 | 0.30 | 0.29 | 0.27 | 0.29 | 0.29 | 0.27 |  |  |  |  |  |  |  |  |  |  |  |  |  |
| **An19** | 0.29 | 0.24 | 0.27 | 0.29 | 0.28 | 0.29 | 0.27 | 0.28 | 0.29 | 0.30 | 0.30 | 0.29 | 0.28 | 0.27 | 0.29 | 0.29 | 0.28 | 0.29 |  |  |  |  |  |  |  |  |  |  |  |  |
| **An20** | 0.29 | 0.24 | 0.26 | 0.29 | 0.28 | 0.27 | 0.28 | 0.28 | 0.29 | 0.29 | 0.29 | 0.29 | 0.29 | 0.27 | 0.28 | 0.29 | 0.27 | 0.29 | 0.29 |  |  |  |  |  |  |  |  |  |  |  |
| **An21** | 0.28 | 0.23 | 0.26 | 0.29 | 0.28 | 0.28 | 0.28 | 0.28 | 0.28 | 0.28 | 0.29 | 0.28 | 0.29 | 0.28 | 0.28 | 0.29 | 0.28 | 0.28 | 0.29 | 0.28 |  |  |  |  |  |  |  |  |  |  |
| **An22** | 0.25 | 0.21 | 0.24 | 0.25 | 0.23 | 0.25 | 0.25 | 0.25 | 0.25 | 0.24 | 0.26 | 0.25 | 0.26 | 0.24 | 0.25 | 0.25 | 0.24 | 0.25 | 0.24 | 0.26 | 0.25 |  |  |  |  |  |  |  |  |  |
| **An23** | 0.28 | 0.22 | 0.26 | 0.28 | 0.27 | 0.28 | 0.28 | 0.28 | 0.28 | 0.29 | 0.29 | 0.29 | 0.28 | 0.28 | 0.29 | 0.29 | 0.28 | 0.28 | 0.28 | 0.28 | 0.28 | 0.25 |  |  |  |  |  |  |  |  |
| **An24** | 0.15 | 0.11 | 0.13 | 0.14 | 0.13 | 0.14 | 0.14 | 0.14 | 0.14 | 0.15 | 0.16 | 0.14 | 0.14 | 0.13 | 0.15 | 0.15 | 0.13 | 0.15 | 0.15 | 0.14 | 0.14 | 0.12 | 0.14 |  |  |  |  |  |  |  |
| **An25** | 0.15 | 0.10 | 0.13 | 0.15 | 0.13 | 0.15 | 0.14 | 0.14 | 0.14 | 0.16 | 0.16 | 0.15 | 0.14 | 0.14 | 0.15 | 0.15 | 0.14 | 0.15 | 0.15 | 0.15 | 0.13 | 0.12 | 0.14 | 0.17 |  |  |  |  |  |  |
| **An26** | 0.13 | 0.11 | 0.13 | 0.14 | 0.11 | 0.12 | 0.11 | 0.12 | 0.13 | 0.13 | 0.15 | 0.14 | 0.13 | 0.12 | 0.13 | 0.11 | 0.10 | 0.14 | 0.13 | 0.13 | 0.11 | 0.11 | 0.11 | 0.15 | 0.15 |  |  |  |  |  |
| **An27** | 0.16 | 0.12 | 0.15 | 0.17 | 0.14 | 0.16 | 0.15 | 0.15 | 0.15 | 0.16 | 0.17 | 0.16 | 0.15 | 0.15 | 0.16 | 0.16 | 0.14 | 0.16 | 0.16 | 0.16 | 0.15 | 0.13 | 0.14 | 0.19 | 0.20 | 0.16 |  |  |  |  |
| **An28** | 0.15 | 0.12 | 0.14 | 0.16 | 0.14 | 0.15 | 0.13 | 0.15 | 0.14 | 0.15 | 0.17 | 0.14 | 0.14 | 0.13 | 0.15 | 0.15 | 0.13 | 0.15 | 0.16 | 0.15 | 0.14 | 0.13 | 0.14 | 0.17 | 0.17 | 0.17 | 0.20 |  |  |  |
| **An29** | 0.14 | 0.10 | 0.13 | 0.15 | 0.12 | 0.14 | 0.13 | 0.13 | 0.15 | 0.15 | 0.15 | 0.15 | 0.14 | 0.13 | 0.15 | 0.15 | 0.13 | 0.14 | 0.15 | 0.14 | 0.14 | 0.12 | 0.14 | 0.19 | 0.18 | 0.15 | 0.20 | 0.18 |  |  |
| **An30** | 0.13 | 0.09 | 0.11 | 0.14 | 0.12 | 0.13 | 0.13 | 0.13 | 0.13 | 0.13 | 0.15 | 0.13 | 0.14 | 0.13 | 0.13 | 0.13 | 0.12 | 0.14 | 0.13 | 0.13 | 0.13 | 0.11 | 0.13 | 0.16 | 0.16 | 0.12 | 0.17 | 0.16 | 0.15 |  |

**Table S3**. Individual relatedness of *A. dumerilii* (Dum) from Michoacán, Mexico.

|  | **Dum01** | **Dum02** | **Dum03** | **Dum04** | **Dum05** | **Dum06** | **Dum07** | **Dum08** | **Dum09** | **Dum10** | **Dum11** | **Dum12** | **Dum13** | **Dum19** | **Dum20** |
| --- | --- | --- | --- | --- | --- | --- | --- | --- | --- | --- | --- | --- | --- | --- | --- |
| **Dum01** |  |  |  |  |  |  |  |  |  |  |  |  |  |  |  |
| **Dum02** | 0.254 |  |  |  |  |  |  |  |  |  |  |  |  |  |  |
| **Dum03** | 0.232 | 0.258 |  |  |  |  |  |  |  |  |  |  |  |  |  |
| **Dum04** | 0.247 | 0.253 | 0.243 |  |  |  |  |  |  |  |  |  |  |  |  |
| **Dum05** | 0.238 | 0.248 | 0.237 | 0.259 |  |  |  |  |  |  |  |  |  |  |  |
| **Dum06** | 0.228 | 0.248 | 0.235 | 0.247 | 0.238 |  |  |  |  |  |  |  |  |  |  |
| **Dum07** | 0.244 | 0.244 | 0.230 | 0.256 | 0.248 | 0.235 |  |  |  |  |  |  |  |  |  |
| **Dum08** | 0.228 | 0.250 | 0.235 | 0.254 | 0.235 | 0.239 | 0.238 |  |  |  |  |  |  |  |  |
| **Dum09** | 0.244 | 0.254 | 0.250 | 0.246 | 0.245 | 0.239 | 0.236 | 0.242 |  |  |  |  |  |  |  |
| **Dum10** | 0.246 | 0.263 | 0.243 | 0.264 | 0.250 | 0.247 | 0.239 | 0.247 | 0.280 |  |  |  |  |  |  |
| **Dum11** | 0.249 | 0.266 | 0.249 | 0.263 | 0.264 | 0.250 | 0.261 | 0.256 | 0.251 | 0.253 |  |  |  |  |  |
| **Dum12** | 0.243 | 0.251 | 0.243 | 0.249 | 0.243 | 0.235 | 0.245 | 0.235 | 0.246 | 0.247 | 0.265 |  |  |  |  |
| **Dum13** | 0.238 | 0.252 | 0.253 | 0.265 | 0.262 | 0.254 | 0.241 | 0.247 | 0.252 | 0.263 | 0.257 | 0.248 |  |  |  |
| **Dum19** | 0.244 | 0.249 | 0.236 | 0.252 | 0.251 | 0.243 | 0.241 | 0.237 | 0.252 | 0.258 | 0.258 | 0.252 | 0.258 |  |  |
| **Dum20** | 0.247 | 0.252 | 0.250 | 0.255 | 0.247 | 0.238 | 0.251 | 0.241 | 0.246 | 0.262 | 0.268 | 0.256 | 0.260 | 0.257 |  |

**Figure S1** Variable sites, considering 11,714 biallelic SNPs, between individuals sampled from *A. andersoni* (N = 30; top) and *A. dumerilii* (N = 15; bottom) from Michoacán, Mexico. White refers to one allele and blue refers to the other allele.


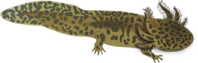

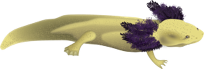


**Figure S2** Heatmap from Euclidean distance between individuals of *A. andersoni* (N = 30, And) and *A. dumerilii* (N = 15, Dum) from Michoacán, Mexico, based on 11,714 binary SNPs obtained with dartR 1.9.9.1 (Gruber et al., 2018) library for R. Darker color red shows higher similarity between individuals, blue at the center refers to no data.

**Figure S3** Discriminant Analysis of Principal Components (DAPC) estimated based on 11,714 binary SNPs from *A. andersoni* (N = 30, purple) and *A. dumerilii* (N = 15, orange) from Michoacán, Mexico. Only one discriminant funcion was retained, which shows that each species is well defined genetic group.

**Figure S4** Cross validation test to define the best value of *K* from admixture. Accordingly, we identified the best value of *K*, as *K* = 2.


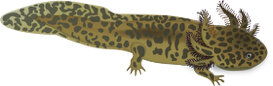

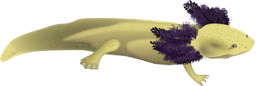


**Figure S5** NeighborNet representing identity by state (IBS) estimated based on 11,714 binary SNPs for individual samples of *A. andersoni* (AnZa, N = 30, purple) and *A. dumerilii* (DuPa, N = 15, orange) from Michoacán, Mexico. Each species constitutes a well differentiated group. In *A. andersoni* some individuals show high reticulation at the base, which can be interpreted as shared ancestry and admixture.
